## **State and trait dimensions of subjective memory concerns: Genetic influences across 30 years**

Tyler Bell<sup>1\*†</sup>, Asad Beck<sup>2\*</sup>, Nathan Gillespie<sup>3</sup>, Chandra Reynolds<sup>4</sup>, McKenna E. Williams<sup>2,5</sup>, Daniel E. Gustavson,<sup>6</sup> Michael J. Lyons,<sup>7</sup> Michael Neale,<sup>3</sup> William S. Kremen<sup>2\*\*</sup>, Carol E. Franz<sup>2\*\*</sup>

<sup>1</sup> Department of Psychiatry and Center for Behavior Genetics of Aging, University of California, San Diego, La Jolla, CA, USA

<sup>2</sup> Center for Neurotechnology, University of Washington, Seattle, WA, USA.

<sup>3</sup> Virginia Institute for Psychiatric and Behavioral Genetics, Virginia Commonwealth University, Richmond, VA, USA.

<sup>4</sup> Department of Psychology, University of California, Riverside, Riverside, CA, USA.

<sup>5</sup> Department of Psychology, San Diego State University, San Diego, CA, USA

<sup>6</sup> Department of Medicine, Vanderbilt Genetics Institute, Vanderbilt University Medical Center, Nashville, TN

<sup>7</sup> Department of Psychology, Boston University, Boston, MA, USA, 02215

\*Tyler Bell and Asad Beck are joint first authors.

\*\*William S. Kremen and Carol E. Franz are joint senior authors.

†Tyler Bell is the corresponding author. Email: [tbell@health.ucsd.edu](mailto:tbell@health.ucsd.edu); physical address: University of California San Diego, 9500 Gilman Drive, 92093; phone: 251-463-0573.

**KEYWORDS:** subjective memory; memory; twin design; longitudinal design; older adults

## Abstract

**INTRODUCTION:** Genetic influences on the stability of subjective memory concerns (SMC) may confound its interpretation as a state-related risk indicator.

**METHODS:** We estimated genetic influences on SMC and SMC change from average ages 38 to 67, genetic correlations of SMC with memory and depressive symptoms at average ages 56, 62, and 67, and correlations of SMC with polygenic scores for Alzheimer's disease and neuroticism, *APOE* genotype, and parental history or dementia.

**RESULTS:** SMC was highly stable over this 30-year period. Heritability was .51. Phenotypically and genetically, SMC was more strongly related to depressive symptoms than to objective memory. It was also correlated with parental history of dementia and polygenic risk for neuroticism.

**DISCUSSION:** SMC's heritability and stability indicate a substantial trait-like component that is related more to depression and personality than objective memory. Improving it as an indicator of impending cognitive decline or dementia will require isolating its state-related component.

## 1 INTRODUCTION

Approximately 20% of adults report subjective memory concerns (SMC) involving self-reported difficulties and worries about learning and recall [1]. SMC is of significant interest due to its relationship with poorer quality of life [2], poorer mental health [3], and elevated risk of Alzheimer's Disease (AD) and related dementias [2-6]. Originally, researchers hypothesized that SMC was a state-like measure, capturing new memory decline as one aged [7]. This assumption has been challenged by studies finding weak associations with actual memory performance [8, 9]. In fact, stronger associations are found between SMC and depressive symptoms [10]. With respect to AD and related dementias, the importance of SMC is viewed primarily as an indicator of impending cognitive decline preceding dementia as indicated by the international workgroup that defined the quasi-diagnostic term subjective cognitive decline (SCD) [1]. In potential contradiction with SMC as a marker of imminent decline, a longitudinal study found trait-like stability of SMC ( $r=.58$ ) assessed at age 40 and 70 [11]. However, this correlation suggests that over 60% of variation in SMC at age 70 is independent of variation at age 40. Furthermore, the trait-like component of SMC warrants further study as this was a relatively small study of only 67 men with data at both timepoints. It is important to better understand what underlies the trait-like component of SMC because any assessment of SMC as a state-related indicator of impending cognitive decline would inevitably include its trait-like component.

In the Adult UK Twin Register, heritability of SMC in adults between 20 and 84 years of age ranged from .37 to .64 [11]. In the Older Australian Twins Study, heritability of SMC was .60 [12]. The remaining variance was attributed to unshared environmental influences. This is surprising because if SMC was due to AD-related cognitive decline, we would not expect SMC to be common in younger adults and to also be heritable. Instead, frequency and heritability would be thought to be strongest at older ages where SMC arises from genetic AD risk. While cross-sectional, this study suggests there may be a trait-like, heritable component to SMC across age in addition to changes potentially driven by AD. Interestingly, a study of only people with newly occurring subjective cognitive decline reported no heritability [13]. Although SMC may be heritable, we still

know nothing about the extent to which the same or different genetic factors may influence SMC at different ages, nor the extent to which shared genetic influences underlie its association with depressive symptoms or objective memory performance. If SMC at later life is related mostly to AD-related changes, we may expect increasing heritability over time. If SMC is long-standing trait reflective of general personality, such as neuroticism, we would expect a heritable trait-like component of SMC across time.

Here we examined genetic and environmental influences on SMC assessed at four timepoints over a 30-year period from ages 38 to 67 as well as SMC's association with objective memory performance and depressive symptoms. We hypothesized that SMC would be more strongly associated with later SMC and depressive symptoms than with objective memory performance [14], and that shared genetic influences would partially underlie the correlation with depressive symptoms. We expected SMC to be relatively stable as people aged, and we hypothesized that the stable variation would be primarily associated with genetic factors. Biometric twin models assessed for the presence of common and new genetic influences over time. In exploratory analyses, we examined associations of SMC with polygenic risk scores for neuroticism and AD, *APOE* genotype, and parental history of dementia.

## 2 METHODS

### 2.1 Participants

The Vietnam Era Twin Study of Aging (VETSA), is a longitudinal study of cognitive and brain aging and risk for AD in a national U.S. sample of community-dwelling men who served at some time during the Vietnam era (1965-1975) [15-17]. The rate of reported combat exposure was only about 20%. Participants are comparable to American men in their age range on health, education, and lifestyle factors [18].

Methods and initial findings from the VETSA have been discussed elsewhere (<http://www.vetsatwins.org/for-researchers/>) [15-17]. Participants were first recruited from 2003 to 2007 and were between ages 51 and 60 years. Participants were invited for follow-up assessments approximately 6 and 12 years later. At these waves, average

ages were 56 ( $n=520$ ), 62 ( $n=199$ ), and 67 ( $n=1192$ ). The sample size was lower at wave 1 for these analyses because the subjective memory questions were added partway into the study. Details on sample sizes by zygosity are expanded in Table S1.

For ease of interpretation, we will use these average ages to refer to specific waves of assessment. At average age 38, the participants completed questionnaires in the Survey of Health, a study that included a question on SMC [19]. Descriptives of this sample are provided in Table 1. Procedures were approved by the Institutional Review Boards at the University of California, San Diego and Boston University.

## **2.2. Subjective memory concerns**

At age 38, SMC was scored using a single item, which was converted into a continuous threshold liability score and standardized. At ages 56, 62, and 67, SMC was scored using 2 items, which were combined into a latent factor score fixing the factor loadings at 0.50 with standardized mean and variance of 0 and 1 respectively. SMC was centered at age 38. As such, in subsequent waves, a score of 0 indicates no change, higher scores indicate greater SMC, and lower scores indicate less SMC after age 38. Table S2 shows question items for each wave.

## **2.3. Objective memory performance**

At average ages 56, 62, and 67, objective memory performance was measured using the immediate and delayed recall portions of the California Verbal Learning Test-II [20], and the Weschler Memory Scale-III Logical Memory and Visual Reproduction subtests [21]. Our previous confirmatory factor analysis show that items on these tests can be best explained by a highly heritable common latent factor [22]. Each subject's latent factor score was adjusted for practice effects as previously described elsewhere [23]. Factor scores at average ages 62 and 67 were fitted in reference to objective memory performance at average age 56. As such, 0 represents performance similar to performance at average age 56,  $>0$  indicates performance improvement from age 56, and  $<0$  represents performance decline from average age 56. There were no objective memory data available from age 38.

## **2.4 Additional measures for exploratory analyses**

We also examined polygenic risk scores (PRSs) for AD [24, 25] and neuroticism [26], which were adjusted for five principal components of ancestry. Methods for deriving PRSs are described in detail elsewhere [26, 27]. We also examined associations with *APOE* genotype ( $\epsilon 4+$  vs.  $\epsilon 4-$ ) and parental history of dementia. Participants were asked, “Did your biological mother/father ever have a serious memory difficulty referred to as senility, Alzheimer’s disease, or other kind of dementia”. Discordant twin pairs i.e., where twins disagreed regarding parental history were coded as missing to avoid ambiguity.

## **2.5. Physical health conditions**

The number of health conditions was measured using an index of the history of hypertension, heart attack, heart failure, stroke, peripheral vascular disease, thrombolysis, angina, diabetes, bronchitis, asthma, cancer, osteoarthritis, rheumatoid arthritis, or cirrhosis reported during the medical interview at each study wave (range from 0 to 14). These conditions were chosen as they are listed in the Charlson Index, a validated index of major medical conditions [28].

## **2.6. Statistical analysis**

### **2.6.1 Phenotypic Analyses**

We first used linear mixed models to characterize the change in SMC at each wave. SMC was regressed onto age as our longitudinal time variable. Random intercepts were used to adjust for the non-independence of SMC reported within individuals and within twin pairs. Scatterplots were used to visualize trends over time.

Next, we tested multivariate relationships using structural equation models in Mplus version 8.4. We used latent variables to provide composites for SMC at ages 56, 62, and 67. SMC at age 38 was based on only one item and left as an observed variable. The structural equation model included: 1) autoregressive (unidirectional) paths from observations within the same measure over time; 2) bidirectional paths that were set at average age 56, 62, and 67 between SMC and objective memory, SMC and depressive symptoms, and objective memory and depressive symptoms; and 3) lagged paths from all variables to all variables at subsequent waves. The model was adjusted

for age and number of health conditions at each wave. We used the TYPE=COMPLEX option to adjust standard errors for dependent data between twins in the same pair. The model incorporated general cognitive ability at average age 20 and SMC at age 38 as predictors of SMC, objective memory, and depressive symptoms at ages 56, 62, and 67.

## 2.6.2 Biometric Twin Analyses

The OpenMx2.9.9.1 software package [29] in R3.4.1 [30] was used to fit univariate and multivariate biometric genetic twin models [31] estimating the relative contribution of genetic and environmental influences within and between the SMC measures [32, 33]. Types of multivariate models are shown in Figure 1. We then created extended biometric models of SMC with objective memory and depressive symptoms at ages 56, 62, and 67 (waves when all variables were assessed) to examine genetic and environmental correlations of SMC with objective memory and depressive symptoms. All code is provided online (<https://github.com/trbellucsd/SubjectiveMemory>). More details about analyses are listed in the Supplemental Information.

## 2.6.3 Exploratory analyses

In exploratory analyses, we examined polychoric correlations between SMC at ages 38, 56, 62, and 67 and polygenic risk scores for AD and neuroticism, as well as *APOE* genotype ( $\epsilon 4+$  vs.  $\epsilon 4-$ ) and parental history of dementia. Polychoric correlations were calculated using the OpenMx<sub>2.9.9.1</sub> software package [29] in R<sub>3.4.1</sub> [30] and were adjusted for the pairing of continuous and categorical variables by applying threshold liability estimation for ordinal and binary variables. Significance levels for set at  $p < .05$ . For the biometric models, we present 95% percent confidence intervals (CI), in which an interval not including zero is considered significant.

# 3 RESULTS

## 3.1 Phenotypic analyses

There was no significant change in SMC over time in the age-based linear mixed models ( $p = .629$ ). We then moved into wave-based SEM analyses to examine SMC over time and their phenotypic, multivariate associations with depressive symptoms and objective memory as shown in Figure 2 (see Table S3 for bivariate correlations). Regarding the earliest measured variables, SMC at age 38 was related to SMC at age 56 ( $\beta=.24, p<.001$ ). Greater general cognitive ability at age 20 was related to better objective memory at age 56 ( $\beta=.42, p<.001$ ). At ages 56, 62, and 67, all autoregressive paths were significant and largest for SMC ( $\beta$ s=.67 to .75,  $ps<.001$ ), objective memory ( $\beta$ s=.65 and .61,  $ps<.001$ ), and depressive symptoms ( $\beta$ s=.61,  $ps<.001$ ), respectively. Significant concurrent associations could also be fixed without significant deterioration in -2LL ( $ps>.05$ ). Specifically, SMC was associated with concurrent lower objective memory ( $\beta$ s=-.12,  $ps<.001$ ) and more depressive symptoms ( $\beta$ s=.61,  $ps<.001$ ). Objective memory was not associated with current depressive symptoms ( $p=.102$ ). Looking at lagged associations, depressive symptoms were associated with worse objective memory at the subsequent waves ( $\beta$ s=-.05 and -.04,  $ps<.05$ ), but not the reverse. No other significant lagged associations were noted.

### 3.2 Biometric twin analyses

Next, we ran a correlated liabilities model to obtain multivariate heritability estimates for SMC. See Table 2 for MZ/DZ correlations. Univariate and multivariate estimates of heritability are presented in Supplemental Tables S3 and S4, respectively. Derived from the multivariate correlated factors model, SMC at age 38 was genetically correlated with SMC at ages 56 ( $r_A=.63$ ), 62 ( $r_A=.56$ ), and 67 ( $r_A=.49$ ); genetic correlations between SMC at ages 56, 62, and 67 were high ( $r_{AS}=.78$  to .90) (see Table 2).

Looking at multivariate models, the best fitting ACE model was the common pathway model compared to the autoregressive or independent pathway models (Table S5, for which the C component was able to be dropped without significant deterioration in model fit (Table S6). As shown in Figure 3, the latent liability of SMC was heritable (heritability =.51, 95% CI:.40; .61). Similarly, the common pathway models fit better than autoregressive or independent pathway models for objective memory and depressive



symptoms (Table S7). Furthermore, in biometric twin models, the C component was able to be dropped without significant deterioration in model fit for objective memory and depressive symptoms (Table S8), showing significant heritability for latent liabilities for objective memory (heritability = .74, 95% CI: .68; .79) and depressive symptoms (heritability = .40, 95% CI: .14; .66).

Extended biometric twin models showed show significant correlations of SMC with the latent liabilities of objective memory and depressive symptoms, in Figures 4 and 5 respectively, and in the expected directions. Genetic correlations ( $r_A$ ) were small between latent liabilities for SMC and objective memory ( $r_A$  [genetic correlation] = -.13, 95% CI: -.21; -.05) and moderate between latent liabilities for SMC and depressive symptoms ( $r_A$  = .29, 95% CI: .20; .36). Unshared environmental correlations ( $r_E$ ) followed a similar pattern for SMC with objective memory ( $r_E$  = -.08, 95% CI: -.14; -.03) and SMC with depressive symptoms ( $r_E$  = .34; 95% CI: .26; .41)

### Exploratory Analyses

We also explored how average SMC related to other genetic and familial risk factors. The latent liability of SMC was not significantly related to the polygenic risk score for AD or to *APOE* genotype. However, the latent liability SMC was significantly positively associated with the polygenic risk score for neuroticism ( $r$  = .08,  $p$  = .018) and with parental history of dementia ( $r$  = .12,  $p$  < .001). Correlations at ages 38, 56, 62, and 67 are also shown in Table 3.

## 4 DISCUSSION

We examined SMC over a 30-year period and its relationship to objective memory performance and depressive symptoms in a group of community-dwelling men. SMC did not show a general increase as objective memory declined across 3 decades and were more reflective of individual differences in depressive symptoms than memory performance. The best-fitting model supported a single underlying latent phenotype that is responsible for the covariation among the SMC measures at different ages. Genetic influences accounted for about half (.51) of the variance in the SMC latent phenotype. Biometric models also showed a moderate amount of shared genetic influences

between SMC and depressive symptoms but only a small amount of shared genetic influences between SMC and objective memory performance. Average SMC was additionally associated with polygenic risk for neuroticism and with parental history of dementia.

In several studies of older adults, SMC has been shown to predict cognitive decline and dementia within 3 to 4 years [7, 34], but others have shown similar rates of future cognitive decline in older adults with and without SMC [14, 35, 36]. Here we found evidence for a weak concurrent association between SMC and level of actual objective memory performance, which has been shown in a sample much older than ours as well [37], but no evidence of SMC predicting future memory performance. There is also evidence that associations between SMC and objective memory are due to general differences at baseline rather than correlated changes across older adulthood [8]. Here, we expand this to show that this seems true when at looking at general differences from later midlife as well.

Taken together, our results are consistent with the idea that SMC involves a trait-like component from very early midlife to early old age. Despite significant declines in objective memory performance across assessment periods in the present study, SMC remained generally stable. The high genetic correlations of SMC over a 30-year period suggest a relatively stable trait-like dimension. Moreover, even SMC at age 38—long before a time when age-related memory decline is thought to occur—was significantly correlated with SMC 20 and more years later [38]. These results build substantially on the one prior small sample study with only two timepoints [11], while also able to estimate genetic and environmental influences due to the twin nature of the data. Consistent with prior studies [14, 15], we showed that about half of the variance in SMC is accounted for by genetic influences. We also demonstrated that a common latent phenotype could best account for SMC across all four timepoints, and the latent phenotype of SMC over time was primarily due to a trait-like genetic factor.

In contrast to objective memory performance, SMC was more strongly related to depressive symptoms, as suggested in prior studies [3, 10, 39, 40]. As a twin study, we were able to examine these relationships beyond the phenotypic level. Our analysis

showed a significant genetic correlation between SMC and depressive symptoms, indicating some shared genetic influences. Taken together with the genetic correlation between SMC and depressive symptoms, we hypothesized that SMC might be genetically related to another trait-like characteristic, namely, personality. Given strong genetic links between depression and anxiety [41], we thus examined the association between SMC and a polygenic risk score for neuroticism. Neuroticism is defined as the tendency to negatively evaluate one's world and self, leading to distress, fear, and avoidance, likely based on high levels of physiological reactivity to stimuli [42]. Like SMC, neuroticism is heritable, stable across adulthood, and related to general levels of depressive symptoms [43]. As would be expected given the substantial genetic overlap between anxiety and depression, individuals with higher SMC were also at higher genetic risk for neuroticism based on the polygenic score. Genes involved in neuroticism have been implicated in the development of brain structures for attention and learning (e.g., anterior cingulate cortex, amygdala, medial temporal lobe, and hippocampus) [44-47], which may be involved in attentional biases toward worrying and distress.

SMC was not related to either the AD polygenic risk score or *APOE* genotype, but it was related to parental history of dementia, perhaps suggesting greater links to general dementia risk. A similar association has been recently found in the Health and Retirement Study, the largest analysis of its kind [48]. It could be that having a parent with dementia increases one's trait levels of SMC, or that dementia-related genes not captured by the AD polygenic risk score underlie the association between SMC and later dementia risk. Future work is needed and SMC measures accounting for the strong trait-like component may improve associations between SMC and genetic AD risk.

Lastly, about half of the variation in SMC was due to unshared rather than shared environmental influences. Such a finding suggests an important role of unique life experiences in how people form their beliefs about subjective memory early on. Negative life experiences can lead to reduced beliefs about one's abilities, which may generalize to evaluations of their cognitive abilities. This can include experiences with

major health concerns and social stressors in adolescence and young adulthood, which may leave one feeling more worried about one's abilities [49]. It may also include evaluations of success in interpersonal relationships, academic performance, and sports [50]. More work will be needed to discern early life events impacting longstanding perceptions of subjective memory.

Our study had limitations to consider. Regarding external validity, our sample may not be generalizable to other groups. For one, our sample was 100% men, limiting generalizability to women. Gender and sex differences have been noted in the association between SMC and objective memory. For example, females who report SMC are more likely to have memory decline, unlike men who showed no such association [51]. Our sample also primarily identified as non-Hispanic White, similar to previous literature on this topic [8]. More diverse samples may show relationships between SMC and memory decline, especially older Latino adults [52, 53]. Our sample came from a community-dwelling population, which may not generalize to individuals seen in clinical settings.

SMC in older adults lowers quality of life, is associated with negative mental health outcomes and elevated the risk for dementia [34]. As such, the nature of SMC is interest for more fully understanding the etiology of these relationships. SMC was originally conceptualized as a state-related factor indirectly capturing memory decline. However, in the present study we found that SMC is a heritable, trait-like phenomenon in older men that was more strongly related to depressive symptoms than to objective memory at both the phenotypic and genetic levels. Furthermore, SMC at follow-up assessments were not related to earlier changes in depressive symptoms or objective memory performance. Consideration of longstanding memory concerns may help researchers and clinicians better detect reports related to actual memory decline. Put another way, it will be important to isolate the state-related component of SMC to improve its utility as a risk indicator of impending cognitive decline or dementia.

**Conflict of Interest Declaration:** The authors declare the absence of known competing financial or personal relationships that could have influenced the work reported in this paper.

**Financial Support:** This work was supported by the National Institute on Aging at the National Institutes of Health grant numbers R01s AG050595 (WSK MJL CEF), AG022381 (WSK), AG037985, AG062483, and P01 AG055367.

## REFERENCES

- [1] Jessen F, Amariglio RE, van Boxtel M, Breteler M, Ceccaldi M, Chetelat G, Dubois B, Dufouil C, Ellis KA, van der Flier WM, Glodzik L, van Harten AC, de Leon MJ, McHugh P, Mielke MM, Molinuevo JL, Mosconi L, Osorio RS, Perrotin A, Petersen RC, Rabin LA, Rami L, Reisberg B, Rentz DM, Sachdev PS, de la Sayette V, Saykin AJ, Scheltens P, Shulman MB, Slavin MJ, Sperling RA, Stewart R, Uspenskaya O, Vellas B, Visser PJ, Wagner M, Subjective Cognitive Decline Initiative Working G (2014) A conceptual framework for research on subjective cognitive decline in preclinical Alzheimer's disease. *Alzheimers Dement* **10**, 844-852.
- [2] Hill NL, McDermott C, Mogle J, Munoz E, DePasquale N, Wion R, Whitaker E (2017) Subjective cognitive impairment and quality of life: A systematic review. *International Psychogeriatrics* **29**, 1965-1977.
- [3] Hill NL, Mogle J, Wion R, Munoz E, DePasquale N, Yevchak AM, Parisi JM (2016) Subjective cognitive impairment and affective symptoms: A systematic review. *The Gerontologist* **56**, e109-e127.
- [4] Fondell E, Townsend MK, Unger LD, Okereke OI, Grodstein F, Ascherio A, Willett WC (2018) Physical activity across adulthood and subjective cognitive function in older men. *European Journal of Epidemiology* **33**, 79-87.
- [5] Griep Y, Hanson LM, Vantilborgh T, Janssens L, Jones SK, Hyde M (2017) Can volunteering in later life reduce the risk of dementia? A 5-year longitudinal study among volunteering and non-volunteering retired seniors. *PLoS One* **12**, e0173885.
- [6] Shirooka H, Nishiguchi S, Fukutani N, Tashiro Y, Nozaki Y, Aoyama T (2018) Subjective cognitive decline and fall risk in community-dwelling older adults with or without objective cognitive decline. *Aging Clinical and Experimental Research* **30**, 457-462.
- [7] Schmand B, Jonker C, Hooijer C, Lindeboom J (1996) Subjective memory complaints may announce dementia. *Neurology* **46**, 121-125.
- [8] Crumley JJ, Stetler CA, Horhota M (2014) Examining the Relationship Between Subjective and Objective Memory Performance in Older Adults: A Meta-Analysis. *Psychology and Aging* **29**, 250-263.
- [9] Hill NL, Bhargava S, Bratlee-Whitaker E, Turner JR, Brown MJ, Mogle J (2021) Longitudinal relationships between subjective cognitive decline and objective memory: Depressive symptoms mediate between-person associations. *Journal of Alzheimer's Disease*, 1-14.
- [10] Mogle J, Hill NL, Bhargava S, Bell TR, Bhang I (2020) Memory complaints and depressive symptoms over time: a construct-level replication analysis. *BMC Geriatr* **20**, 57.
- [11] Singer JJ, MacGregor AJ, Cherkas LF, Spector TD (2005) Where did I leave my keys? A twin study of self-reported memory ratings using the multifactorial memory questionnaire. *Twin Research and Human Genetics* **8**, 108-112.
- [12] Catts V, Thalamuthu A, Lee T, Crawford J, Sachdev P (2019) in *Behavior Genetics* SPRINGER 233 SPRING ST, NEW YORK, NY 10013 USA, pp. 516-516.
- [13] Caracciolo B, Gatz M, Xu W, Pedersen NL, Fratiglioni L (2012) Differential distribution of subjective and objective cognitive impairment in the population: a nation-wide twin-study. *Journal of Alzheimer's Disease* **29**, 393-403.
- [14] Gustavson DE, Jak AJ, Elman JA, Panizzon MS, Franz CE, Gifford KA, Reynolds CA, Toomey R, Lyons MJ, Kremen WS (2021) How well does subjective cognitive decline correspond to objectively measured cognitive decline? Assessment of 10–12 year change. *Journal of Alzheimer's Disease*, 1-14.

- [15] Kremen WS, Fennema-Notestine C, Eyer LT, Panizzon MS, Chen CH, Franz CE, Lyons MJ, Thompson WK, Dale AM (2013) Genetics of brain structure: Contributions from the Vietnam Era Twin Study of Aging. *Am J Med Genet B Neuropsychiatr Genet* **162B**, 751-761.
- [16] Kremen WS, Franz CE, Lyons MJ (2019) Current Status of the Vietnam Era Twin Study of Aging (VETSA). *Twin Res Hum Genet* **22**, 783-787.
- [17] Kremen WS, Thompson-Brenner H, Leung YM, Grant MD, Franz CE, Eisen SA, Jacobson KC, Boake C, Lyons MJ (2006) Genes, environment, and time: the Vietnam Era Twin Study of Aging (VETSA). *Twin Res Hum Genet* **9**, 1009-1022.
- [18] Schoeneborn CA, Heyman KM (2009) in *National Health Statistics Reports* National Center for Health Statistics, Hyattsville, MD.
- [19] Henderson WG, Eisen S, Goldberg J, True WR, Barnes JE, Vitek ME (1990) The Vietnam Era Twin Registry: a resource for medical research. *Public Health Reports* **105**, 368.
- [20] Delis DC, Kramer JH, Kaplan E, Ober BA (2000) *California Verbal Learning Test (CVLT-2)*. 2nd ed.. Psychological Corporation, San Antonio, TX.
- [21] Wechsler D (1987) *WMS-R: Wechsler memory scale-revised*, Psychological Corporation.
- [22] Kremen WS, Panizzon MS, Franz CE, Spoon KM, Vuoksimaa E, Jacobson KC, Vasilopoulos T, Xian H, McCaffery JM, Rana BK, Toomey R, McKenzie R, Lyons MJ (2014) Genetic complexity of objective memory: A twin approach to studies of aging. *Psychol Aging* **29**, 404-417.
- [23] Elman JA, Jak AJ, Panizzon MS, Tu XM, Chen T, Reynolds CA, Gustavson DE, Franz CE, Hatton SN, Jacobson KC, Toomey R, McKenzie R, Xian H, Lyons MJ, Kremen WS (2018) Underdiagnosis of mild cognitive impairment: A consequence of ignoring practice effects. *Alzheimers Dement (Amst)* **10**, 372-381.
- [24] Lloyd-Jones LR, Zeng J, Sidorenko J, Yengo L, Moser G, Kemper KE, Wang H, Zheng Z, Magi R, Esko T (2019) Improved polygenic prediction by Bayesian multiple regression on summary statistics. *Nature Communications* **10**, 1-11.
- [25] Kunkle BW, Grenier-Boley B, Sims R, Bis JC, Damotte V, Naj AC, Boland A, Vronskaya M, Van Der Lee SJ, Amlie-Wolf A (2019) Genetic meta-analysis of diagnosed Alzheimer's disease identifies new risk loci and implicates A $\beta$ , tau, immunity and lipid processing. *Nature Genetics* **51**, 414-430.
- [26] Luciano M, Hagenaars SP, Davies G, Hill WD, Clarke T-K, Shiralil M, Harris SE, Marioni RE, Liewald DC, Fawns-Ritchie C (2018) Association analysis in over 329,000 individuals identifies 116 independent variants influencing neuroticism. *Nature Genetics* **50**, 6-11.
- [27] Lambert J-C, Ibrahim-Verbaas CA, Harold D, Naj AC, Sims R, Bellenguez C, Jun G, DeStefano AL, Bis JC, Beecham GW (2013) Meta-analysis of 74,046 individuals identifies 11 new susceptibility loci for Alzheimer's disease. *Nature Genetics* **45**, 1452-1458.
- [28] Charlson M, Szatrowski TP, Peterson J, Gold J (1994) Validation of a combined comorbidity index. *J Clin Epidemiol* **47**, 1245-1251.
- [29] Neale MC, Hunter MD, Pritikin JN, Zahery M, Brick TR, Kirkpatrick RM, Estabrook R, Bates TC, Maes HH, Boker SM (2016) OpenMx 2.0: Extended Structural Equation and Statistical Modeling. *Psychometrika* **81**, 535-549.
- [30] Team RC (2013) R: A language and environment for statistical computing. R Foundation for Statistical Computing, Vienna, Austria. <http://www.R-project.org/>.
- [31] Neale MC, Cardon LR (1992) *Methodology for Genetic Studies of Twins and Families*, Kluwer Academic Publishers, Dordrecht.
- [32] Neale MC, Cardon LR (1992) *Methodology for genetic studies of twins and families*, Kluwer, Dordrecht, The Netherlands.
- [33] Boker S, Neale M, Maes H, Wilde M, Spiegel M, Brick T, Spies J, Estabrook R, Kenny S, Bates T, Mehta P, Fox J (2011) OpenMx: An Open Source Extended Structural Equation Modeling Framework. *Psychometrika* **76**, 306-317.

- [34] Wion R, Hill N, Bell T, Mogle J, Yates J, Bhang I (2020) Does cognitive self-report measure type differentially predict cognitive decline? A systematic review. *Innovation in Aging* **4**, 292-292.
- [35] Flicker C, Ferris SH, Reisberg B (1993) A longitudinal study of cognitive function in elderly persons with subjective memory complaints. *Journal of the American Geriatrics Society* **41**, 1029-1032.
- [36] Hertzog C, Hülür G, Gerstorf D, Pearman AM (2018) Is subjective memory change in old age based on accurate monitoring of age-related memory change? Evidence from two longitudinal studies. *Psychology and Aging* **33**, 273.
- [37] Hülür G, Willis SL, Hertzog C, Schaie KW, Gerstorf D (2018) Is subjective memory specific for memory performance or general across cognitive domains? Findings from the Seattle Longitudinal Study. *Psychology and Aging* **33**, 448.
- [38] Salthouse TA (2009) When does age-related cognitive decline begin? *Neurobiol Aging* **30**, 507-514.
- [39] Hill NL, Mogle J, Bhargava S, Bell TR, Bhang I, Katz M, Sliwinski MJ (2020) Longitudinal relationships among depressive symptoms and three types of memory self-report in cognitively intact older adults. *Int Psychogeriatr* **32**, 719-732.
- [40] Hill NL, Mogle J, Bhargava S, Whitaker E, Bhang I, Capuano AW, Arvanitakis Z, Bennett DA, Barnes LL (2020) Differences in the Associations Between Memory Complaints and Depressive Symptoms Among Black and White Older Adults. *J Gerontol B Psychol Sci Soc Sci* **75**, 783-791.
- [41] Morneau-Vaillancourt G, Coleman JR, Purves KL, Cheesman R, Rayner C, Breen G, Eley TC (2020) The genetic and environmental hierarchical structure of anxiety and depression in the UK Biobank. *Depression and anxiety* **37**, 512-520.
- [42] Barlow DH, Sauer-Zavala S, Carl JR, Bullis JR, Ellard KK (2014) The nature, diagnosis, and treatment of neuroticism: Back to the future. *Clinical Psychological Science* **2**, 344-365.
- [43] Fergusson D, Horwood L, Lawton J (1989) The relationships between neuroticism and depressive symptoms. *Social Psychiatry and Psychiatric Epidemiology* **24**, 275-281.
- [44] Opel N, Amare AT, Redlich R, Reppe J, Kaehler C, Grotegerd D, Dohm K, Zaremba D, Leehr EJ, Böhnlein J (2020) Cortical surface area alterations shaped by genetic load for neuroticism. *Molecular Psychiatry* **25**, 3422-3431.
- [45] Wright CI, Williams D, Feczko E, Barrett LF, Dickerson BC, Schwartz CE, Wedig MM (2006) Neuroanatomical correlates of extraversion and neuroticism. *Cerebral Cortex* **16**, 1809-1819.
- [46] Zufferey V, Donati A, Popp J, Meuli R, Rossier J, Frackowiak R, Draganski B, von Gunten A, Kherif F (2017) Neuroticism, depression, and anxiety traits exacerbate the state of cognitive impairment and hippocampal vulnerability to Alzheimer's disease. *Alzheimer's & Dementia: Diagnosis, Assessment & Disease Monitoring* **7**, 107-114.
- [47] DeYoung CG, Hirsh JB, Shane MS, Papademetris X, Rajeevan N, Gray JR (2010) Testing predictions from personality neuroscience: Brain structure and the big five. *Psychological Science* **21**, 820-828.
- [48] Bell TR, Hill NL, Bhargava S, Mogle J (2021) Parental dementia and subjective memory impairment in the health and retirement study. *Aging & Mental Health*, 1-9.
- [49] Raposa EB, Hammen CL, Brennan PA, O'Callaghan F, Najman JM (2014) Early adversity and health outcomes in young adulthood: The role of ongoing stress. *Health Psychology* **33**, 410.
- [50] Ardelt M, Gerlach KR, Vaillant GE (2018) Early and midlife predictors of wisdom and subjective well-being in old age. *The Journals of Gerontology: Series B* **73**, 1514-1525.
- [51] Drouin SM, McFall GP, Dixon RA (2020) In multiple facets of subjective memory decline sex moderates memory predictions. *Alzheimer's & Dementia: Diagnosis, Assessment & Disease Monitoring* **12**, e12089.



- [52] Nakhla MZ, Cohen L, Salmon DP, Smirnov DS, Marquine MJ, Moore AA, Schiehser DM, Zlatar ZZ (2021) Self-reported subjective cognitive decline is associated with global cognition in a community sample of Latinos/as/x living in the United States. *Journal of Clinical and Experimental Neuropsychology*, 1-14.
- [53] Bell TR, Pope CN, Downer B, Barba C, Crowe M (2021) Pain associates with subjective memory problems and cognition in older Puerto Rican adults. *Neuropsychol Dev Cogn B Aging Neuropsychol Cogn*, 1-15.

Table 1. Descriptives of the study sample across waves.

| Variable                                |              | VETSA Wave 1 | VETSA Wave 2 | VETSA Wave 3 |           |
|-----------------------------------------|--------------|--------------|--------------|--------------|-----------|
| Sample size                             | <i>n</i>     | 520          | 1199         | 1192         |           |
| Age                                     | <i>M(SD)</i> | 56.15 (2.72) | 61.50 (2.43) | 67.35 (2.57) |           |
| MZ Pairs                                | <i>n</i>     | 134          | 328          | 301          |           |
| DZ Pairs                                | <i>n</i>     | 116          | 233          | 206          |           |
| Unpaired twins / singletons             | <i>n</i>     | 30           | 77           | 344          |           |
| Subjective Memory Concerns <sup>a</sup> | <i>M(SD)</i> | -.03 (1.22)  | -.02 (1.25)  | -.03 (1.23)  |           |
| Objective memory <sup>b</sup>           | <i>M(SD)</i> | .03 (1.04)   | -.27 (1.02)  | -.50 (1.08)  |           |
| Depressive Symptoms (CESD) <sup>c</sup> | <i>M(SD)</i> | 8.25 (8.15)  | 7.41 (8.11)  | 7.11 (7.61)  |           |
| Health Conditions                       |              |              |              |              |           |
|                                         | 0            | <i>n</i> (%) | 169 (32%)    | 256 (21%)    | 174 (15%) |
|                                         | 1            | <i>n</i> (%) | 117 (23%)    | 232 (19%)    | 227 (19%) |
|                                         | 2+           | <i>n</i> (%) | 234 (45%)    | 712 (59%)    | 792 (66%) |

Notes. DZ = dizygotic; MZ = monozygotic. Objective memory was measured using the immediate and delayed portions of the California Verbal Learning Task-II, Weschler Memory Scale-III Logical Memory task, and the Weschler Memory Scale-III Visual Reproduction task. Depressive symptoms were measured using the Center of Epidemiological Studies - Depression Scale. Memory ratings and memory concerns are rated from 1 to 4, with higher scores indicating more subjective memory concerns (poorer memory ratings, more memory concerns).

<sup>a</sup>Subjective Memory concerns is a factor score derived from a structural equation standardized to subjective memory concerns at average age 38, where higher scores indicate more subjective memory concerns.

<sup>b</sup>Objective memory is a factor score from multiple tests of episodic memory standardized to baseline, where higher scores indicate better objective memory.

<sup>c</sup>Depressive symptoms are measured using the 20-item CESD, which counts the number of depressive symptoms experienced.

Table 2. Within Pair, Phenotypic, and Genetic Correlations of Subjective Memory Concerns (SMC).

| Variables     | MZ          | DZ          | Phenotypic (below diagonal) and Genetic Correlations (above diagonal) |            |            |            |
|---------------|-------------|-------------|-----------------------------------------------------------------------|------------|------------|------------|
|               |             |             | 1                                                                     | 2          | 3          | 4          |
| 1. SMC Age 38 | <b>0.21</b> | <b>0.18</b> | -                                                                     | <b>.63</b> | <b>.56</b> | <b>.49</b> |
| 2. SMC Age 56 | <b>0.34</b> | <b>0.12</b> | <b>.27</b>                                                            | -          | <b>.90</b> | <b>.78</b> |
| 3. SMC Age 62 | <b>0.29</b> | <b>0.11</b> | <b>.19</b>                                                            | <b>.52</b> | -          | <b>.87</b> |
| 4. SMC Age 67 | <b>0.38</b> | 0.05        | <b>.25</b>                                                            | <b>.47</b> | <b>.59</b> | -          |

Note. MZ = monozygotic twins; DZ = dizygotic twins; SMC = subjective memory concerns.

Significant *p*-values are bolded.

Table 3. Exploratory associations between subjective memory concerns and genetic risk factors.

|                              | Subjective Memory Concerns |             |          |          |            |             |            |                 |                     |                 |
|------------------------------|----------------------------|-------------|----------|----------|------------|-------------|------------|-----------------|---------------------|-----------------|
|                              | Age 38                     |             | Age 56   |          | Age 62     |             | Age 67     |                 | Average Across Time |                 |
|                              | <i>r</i>                   | <i>p</i>    | <i>r</i> | <i>p</i> | <i>r</i>   | <i>p</i>    | <i>r</i>   | <i>p</i>        | <i>r</i>            | <i>p</i>        |
| AD PGRS                      |                            |             | -        |          |            |             | -          |                 | -                   |                 |
| SBayesR                      | -.01                       | .566        | .11      | .017     | -.02       | .551        | .001       | .981            | .05                 | .187            |
| Neuroticism                  |                            |             |          |          |            |             |            |                 |                     |                 |
| PGRS <sub>0.5</sub>          | <b>.08</b>                 | <b>.006</b> | .09      | .064     | .05        | .112        | <b>.07</b> | <b>.047</b>     | <b>.08</b>          | <b>.018</b>     |
| Parental History of Dementia |                            |             | -        |          |            |             |            |                 |                     |                 |
| APOE e4 allele status        | -.03                       | .321        | .09      | .099     | <b>.09</b> | <b>.006</b> | <b>.14</b> | <b>&lt;.001</b> | <b>.12</b>          | <b>&lt;.001</b> |
|                              | -.003                      | .921        | .09      | .099     | .05        | .127        | .04        | .178            | .01                 | .761            |

Notes. AD = Alzheimer's disease; PGRS = polygenic risk score. PGRS adjusted for the first five principle components of ancestry. AD PGRS was calculated based on the genome-wide association study by Kunkle et al. (2019) and estimated using SBayesR. Neuroticism PGRS was calculated based on the genome-wide association study by Luciano et al. (2018) at the optimal *p*-value threshold of .50. Pearson correlations were used for correlations between continuous variables. Polychoric correlations were used in correlations with APOE4 carrier status and parental history of dementia to account for their binary nature. Significant *p*-values are bolded.

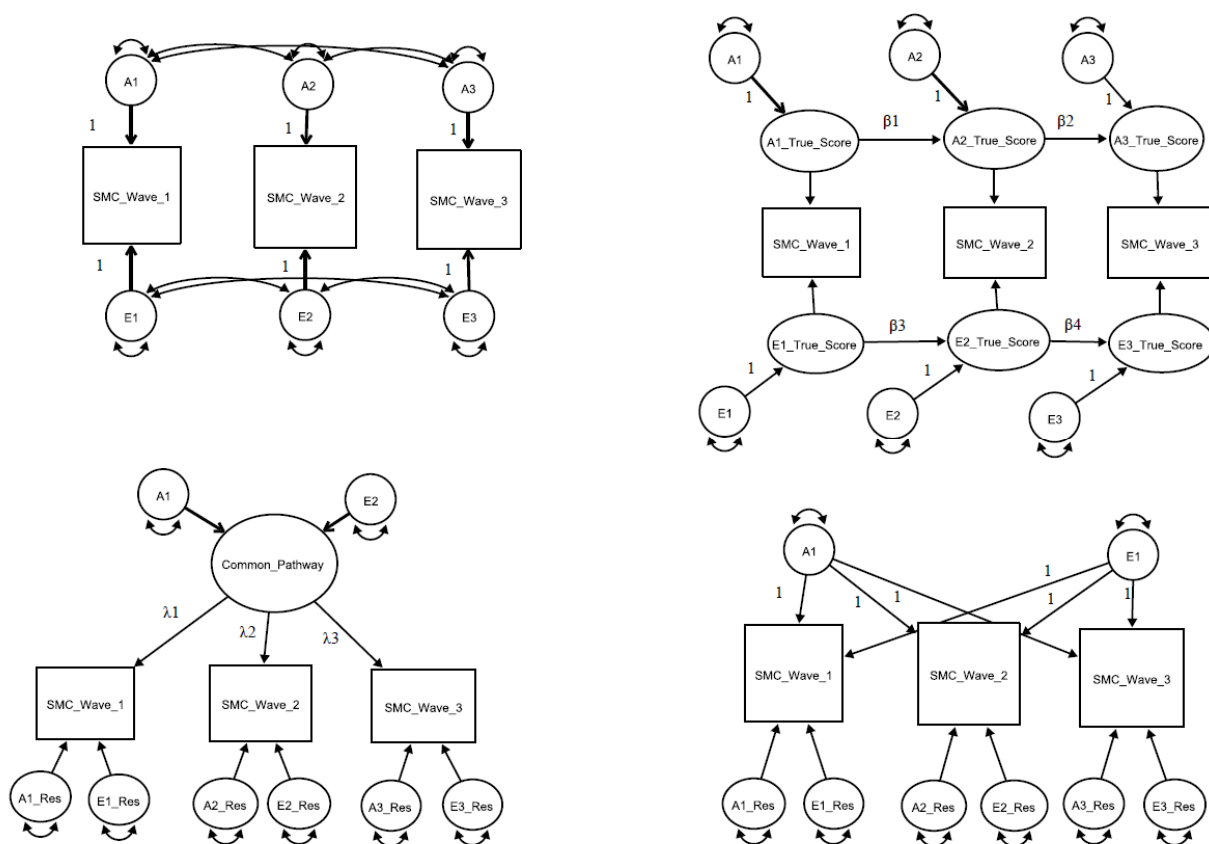

Figure 1. Types of multivariate biometric genetic twin models.

Note. Multivariate correlated factors (A) and competing hypothetical models to explain the sources of variance-covariance between subjective memory concerns (SMC) at each assessment wave. Competing models include (B) the auto-regression, (C) common pathway, and (D) independent pathway models. For brevity, only latent additive genetic (A1–3) and non-shared environmental (E1–3) factors are shown. (A) The multivariate correlated factor model estimates the size of the latent genetic and environmental variances and covariances (double-headed arrows). It is atheoretical and makes no prediction about the nature of change in SMC over time. (B) In the autoregression model, the time-specific genetic (variance of A1–3) and environmental (variance of A1–3) variance components or “innovations” for each genetic (A1–3) and environmental (E1–3) latent factor true score are estimated along with each variable’s residual or error variance (residual of E1–E3). Also estimated are the autoregression or causal coefficients ( $\beta$ ) from one latent true score to the next. (C) In the common pathway model, the genetic (A1) and environmental (E1) variance components for the common pathway, the factor loadings (paths not set to 1 from latent factor), and latent genetic and environmental residuals are estimated. (D) Finally, in the independent pathway model, genetic and environmental variance components are estimated independently with their factor loadings, and latent genetic and environmental residuals.

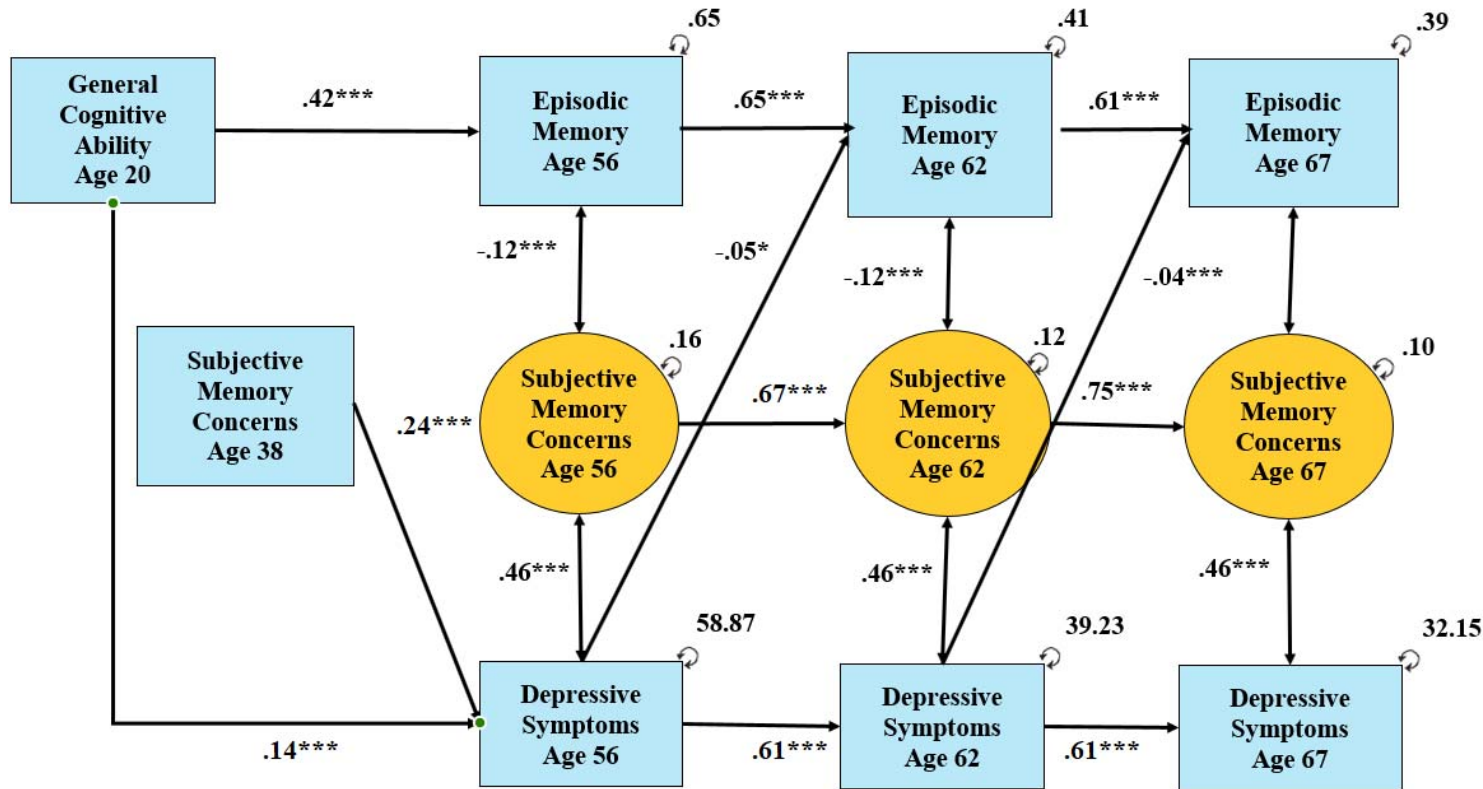

Figure 2. Structural equation model of phenotypic associations between subjective memory concerns, objective memory, and depressive symptoms.

Note. This structural equation model is additionally adjusted for age, the number of health conditions, and clustering of twin pairs. For readability, only significant paths ( $p < .05$ ) are shown. The model included a test for all possible bidirectional and lagged paths between variables. The labeled ages stand for the average age of the sample at the wave when the variable was collected. Note that subjective memory concerns at age 38 were an observed variable (as it only included one item) compared to subjective memory concerns at ages 56, 62, and 67, which are latent variables (as there were two items measured at these waves).

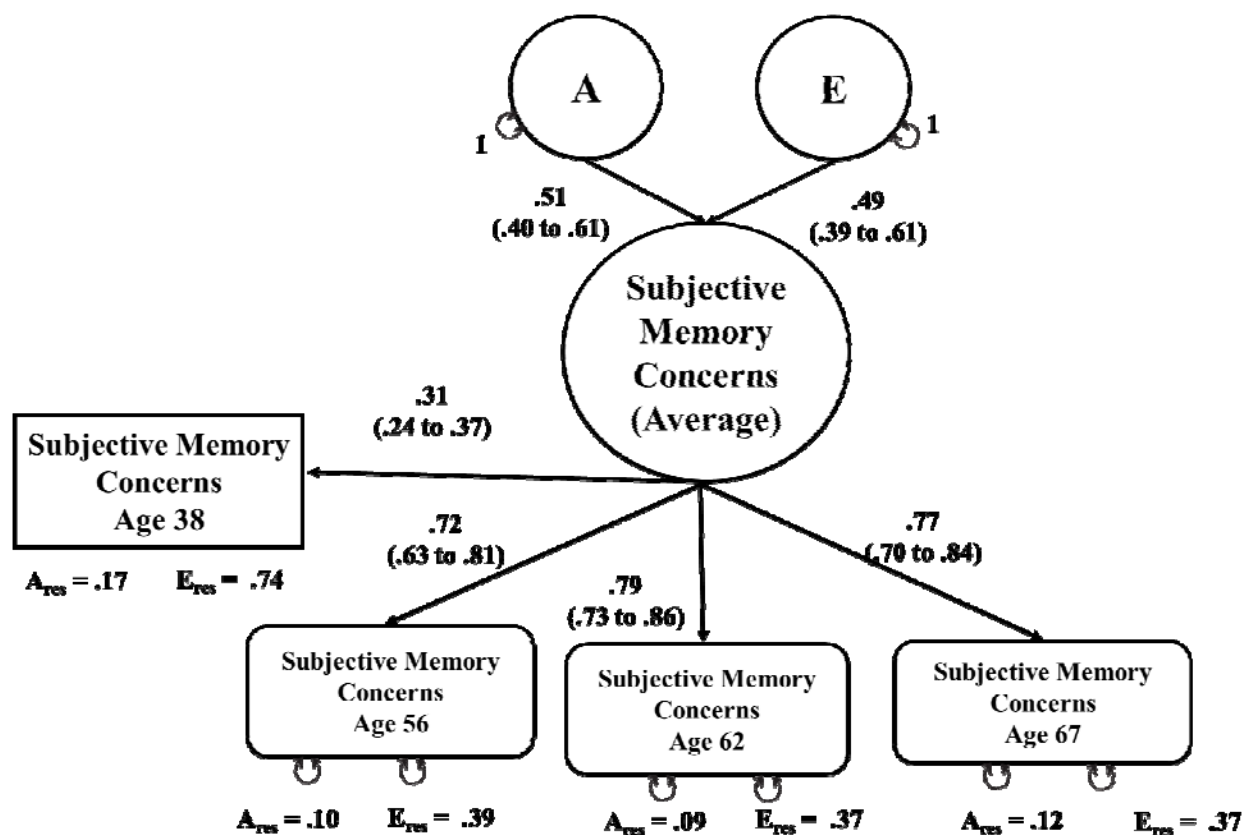

Figure 3. Common pathway model of subjective memory concerns.

Note. A = additive genetic influence (heritability); A res. = residual for genetic influences (A); E = unshared environmental influences; E res. = residual for unshared environmental influences (E). Subjective memory concerns at age 38 is an observed measure from one item described in the measures. Subjective memory concerns at age 56, 62, and 67 are factor scores from two items from the phenotypic SEM model.

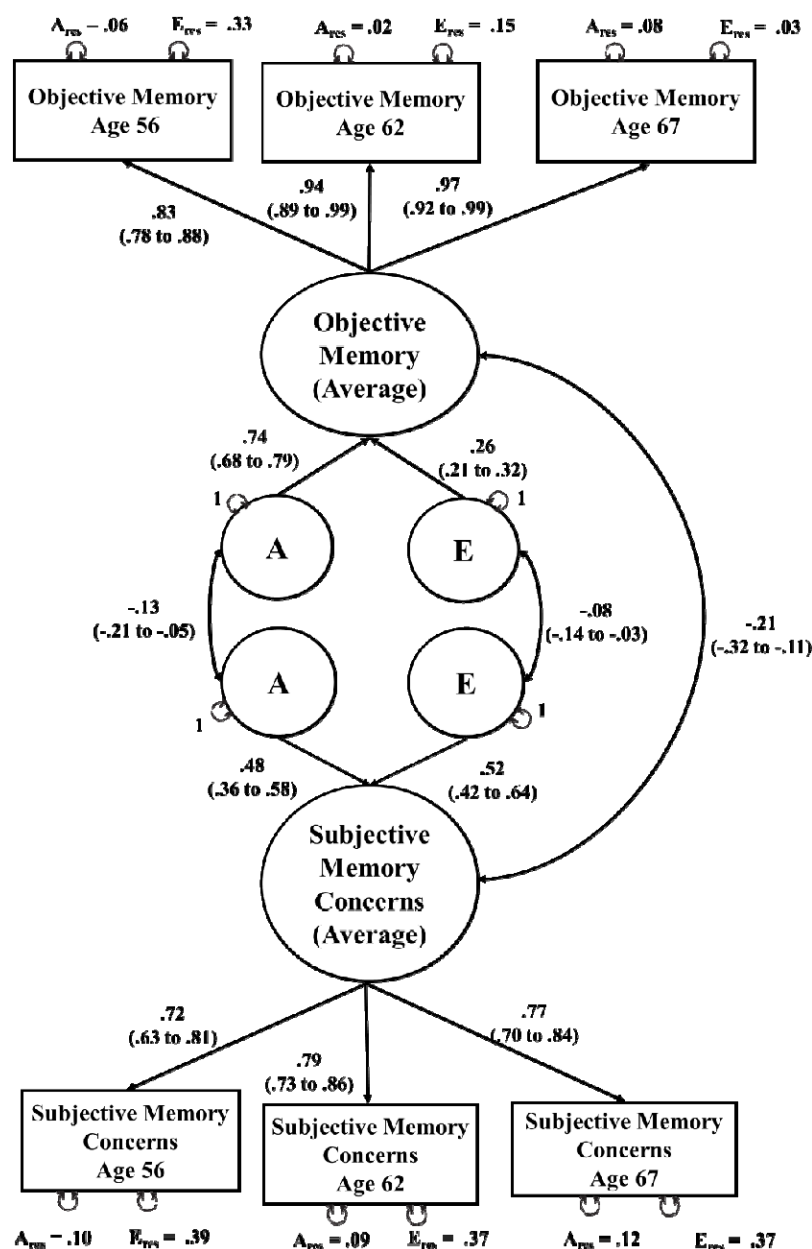

Figure 4. Common pathway model showing associations between subjective memory concerns and objective memory.

Note. A = additive genetic influence (heritability); A res. = residual for genetic influences (A); E = unshared environmental influences; E res. = residual for unshared environmental influences (E).



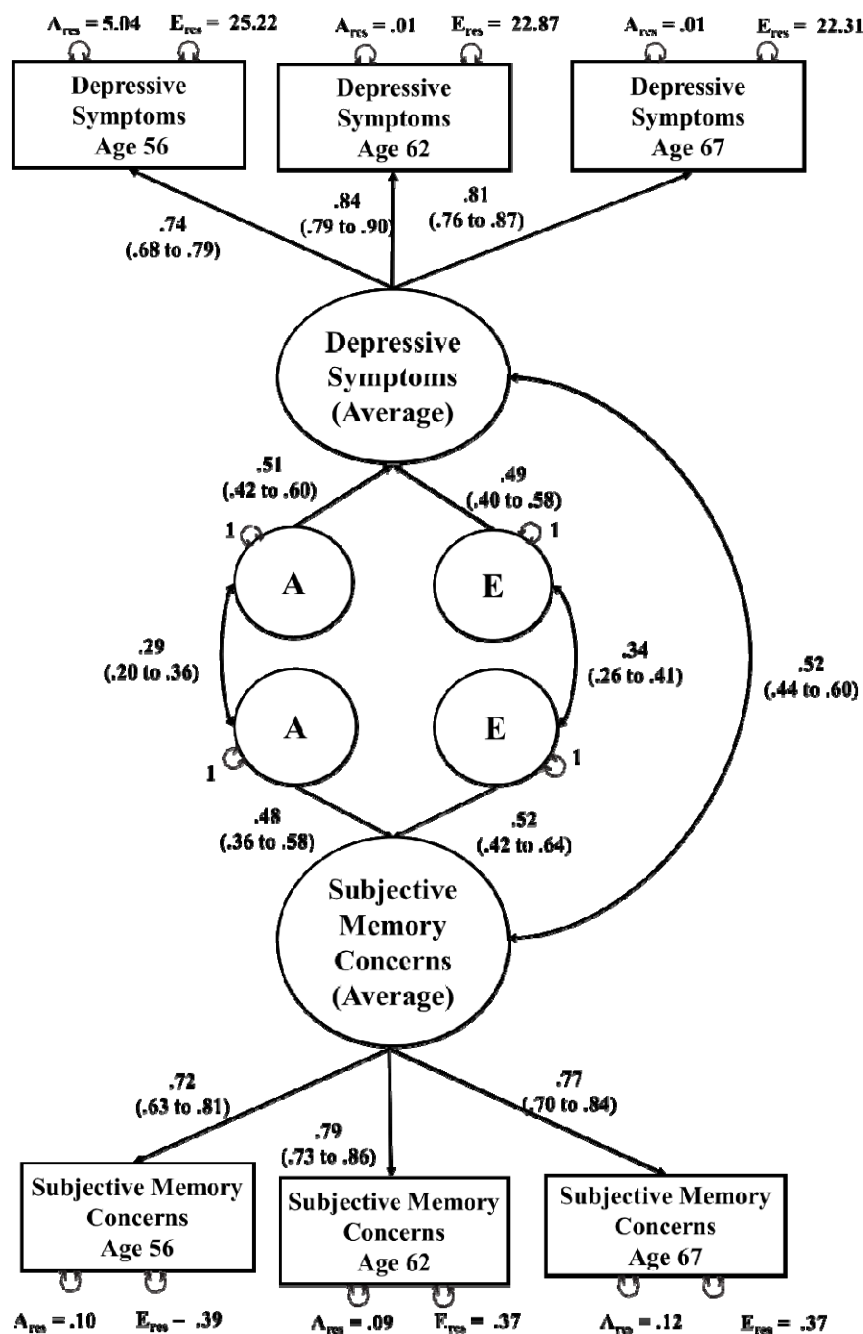

Figure 5. Common pathway model showing the association between subjective memory concerns and depressive symptoms.

Note. A = additive genetic influence (heritability); ; A res. = residual for genetic influences (A); E = unshared environmental influences; E res. = residual for unshared environmental influences (E).
